# Supplementary material for: Effectiveness, Immunogenicity and Harms of Additional SARS-CoV-2 Vaccine Doses in Kidney Transplant Recipients: A Systematic Review
Source: MDPI journal article supplement (doi:10.3390/vaccines11040863), 2023-04-18
Supplement: s1 [file s1]

## Content

|                                                                                                            |           |
|------------------------------------------------------------------------------------------------------------|-----------|
| <b>Literature search .....</b>                                                                             | <b>2</b>  |
| <i>Cochrane Covid Study register (CCSR).....</i>                                                           | <i>2</i>  |
| <i>Web of Science (Core Collection) – Science Citation Index and Emerging Sources Citation Index.....</i>  | <i>2</i>  |
| <i>WHO COVID 19 Global literature on coronavirus disease .....</i>                                         | <i>3</i>  |
| <b>Risk of Bias .....</b>                                                                                  | <b>4</b>  |
| <b>Supplemental Table S1: Risk of Bias in Overall Prognosis Studies (ROB-OPS) tool, Version 0.1 .....</b>  | <b>4</b>  |
| <b>Changes to the protocol.....</b>                                                                        | <b>5</b>  |
| <b>Supplemental Figure S1: Risk of Bias Assessment.....</b>                                                | <b>6</b>  |
| <b>Supplemental Figure S2: Sensitivity analysis: Exclusion of all studies with high risk of bias .....</b> | <b>15</b> |
| <b>Supplemental Figure S3: Subgroup analysis: Immunosuppressive therapy.....</b>                           | <b>16</b> |
| <b>Supplemental Table S2: Main Study Characteristics .....</b>                                             | <b>17</b> |
| <b>Supplemental Table S3: Antibody Titers.....</b>                                                         | <b>21</b> |
| <b>Supplemental Table S4: Neutralizing antibodies against Delta .....</b>                                  | <b>23</b> |
| <b>Supplemental Table S5: Neutralizing antibodies against Omicron .....</b>                                | <b>24</b> |
| <b>Supplemental Table S6: T-cell response .....</b>                                                        | <b>25</b> |
| <b>Supplemental Table S7: Co-interventions .....</b>                                                       | <b>26</b> |
| <b>Supplemental Table S8: Transplant vintage of patients with and without seroconversion .....</b>         | <b>27</b> |
| <b>Checklist of items to include when reporting a systematic review or meta-analysis.....</b>              | <b>28</b> |

## Literature search

### Cochrane Covid Study register (CCSR)

kidney\* or renal\* or organ\* or SOT

AND

transplant\* or graft\*

AND

vaccin\* or biontech\* or pfizer\* or comirnaty\* or cominarty\* or corminaty\* or BNT162\* or "BNT 162" or "BNT 162b2" or tozinameran\* or moderna\* or spikevax\* or 1273\* or mRNA1273\* or "TAK-919" or "CX-024414" or CX024414\* or astrazeneca\* or oxford\* or vaxzevria\* or AZD1222\* or covishield\* or ChAdOx\* or Janssen\* or "JNJ-78436735" or JNJ78436735\* or VAC31518\* or "VAC-31518" or "Johnson COVID-19" or "Johnson COVID19" or Ad26\* or Ad5\* or Sputnik\* or rAd26\* or rAd5\* or gamaleya\* or "Gam-COVID-Vac" or "recombinant adenovirus type" or "adenovirus vector" or "combined vector" or BBIBP\* or sinopharm\* or "vero cell" or "vero cells" or covilo or sinovac\* or PiCoVax\* or coronavac\* or nuvaxovid\* or novavax\* or "NVX-CoV2373" or "SARS-CoV-2 rS" or "M1-Adjuvant" or "nanoparticle vaccine" or "Bharat biotech" or BBV152\* or "BBV 152A" or "BBV 152B" or "BBV152C" or "BBV152D" or "BBV 152 A" or "BBV 152 B" or "BBV152 C" or "BBV152 D" or "BBV-152" or covaxin\* or boost\* or "third dose" or "third doses" or "third dosis" or "three dose" or "three doses" or "three dosis" or "fourth dose" or "fourth doses" or "fourth dosis" or "four dose" or "four doses" or "four dosis"

(no limitations set to study design)

### Web of Science (Core Collection) – Science Citation Index and Emerging Sources Citation Index

- Science Citation Index Expanded (1945-present)
- Emerging Sources Citation Index (2015-present)
- Limit to 2020 - 2022

#1 (TI=(COVID OR COVID19 OR "SARS-CoV-2" OR "SARS-CoV2" OR SARSCoV2 OR "SARSCoV-2" OR "SARS coronavirus 2" OR "2019 nCoV" OR "2019nCoV" OR "2019-novel CoV" OR "nCov 2019" OR "nCov 19" OR "severe acute respiratory syndrome coronavirus 2" OR "novel coronavirus disease" OR "novel corona virus disease" OR "corona virus disease 2019" OR "coronavirus disease 2019" OR "novel coronavirus pneumonia" OR "novel corona virus pneumonia" OR "severe acute respiratory syndrome coronavirus 2")) OR AB=(COVID OR COVID19 OR "SARS-CoV-2" OR "SARS-CoV2" OR SARSCoV2 OR "SARSCoV-2" OR "SARS coronavirus 2" OR "2019 nCoV" OR "2019nCoV" OR "2019-novel CoV" OR "nCov 2019" OR "nCov 19" OR "severe acute respiratory syndrome coronavirus 2" OR "novel coronavirus disease" OR "novel corona virus disease" OR "corona virus disease 2019" OR "coronavirus disease 2019" OR "novel coronavirus pneumonia" OR "novel corona virus pneumonia" OR "severe acute respiratory syndrome coronavirus 2"))

#2 (TI=(vaccin\* OR biontech\* OR pfizer\* OR comirnaty\* OR cominarty\* OR corminaty\* OR BNT162\* OR "BNT 162" OR "bnt 162b2" OR tozinameran\* OR moderna\* OR spikevax\* OR 1273\* OR mRNA1273\* OR "TAK-919" OR "CX-024414" OR CX024414\* OR astrazeneca\* OR oxford\* OR

vaxzevria\* OR AZD1222\* OR covishield\* OR ChAdOx\* OR Janssen\* OR "JNJ-78436735" OR JNJ78436735\* OR VAC31518\* OR "VAC-31518" OR "Johnson COVID-19" OR "Johnson COVID19" OR Ad26\* OR Ad5\* OR Sputnik\* OR rAd26\* OR rAd5\* OR gamaleya\* OR "Gam-COVID-Vac" OR "recombinant adenovirus type" OR "adenovirus vector" OR "combined vector" OR BBIBP\* OR sinopharm\* OR "vero cell" OR "vero cells" OR covilo OR sinovac\* OR PiCoVax\* OR coronavac\* OR Nuvaxovid\* OR Novavax\* OR "NVX-CoV2373" OR "SARS-CoV-2 rS" OR "M1-Adjuvant" OR "nanoparticle vaccine" OR "Bharat biotech" OR BBV152\* OR "BBV 152A" OR "BBV 152B" OR "BBV152C" OR "BBV152D" OR "BBV 152 A" OR "BBV 152 B" OR "BBV152 C" OR "BBV152 D" OR "BBV-152" OR Covaxin\* OR boost\* OR "third dose" OR "third doses" OR "third dosis" OR "three dose" OR "three doses" OR "three dosis")) OR AB=(vaccin\* OR biontech\* OR pfizer\* OR comirnaty\* OR cominarty\* OR corminaty\* OR BNT162\* OR "BNT 162" OR "bnt 162b2" OR tozinameran\* OR moderna\* OR spikevax\* OR 1273\* OR mRNA1273\* OR "TAK-919" OR "CX-024414" OR CX024414\* OR astrazeneca\* OR oxford\* OR vaxzevria\* OR AZD1222\* OR covishield\* OR ChAdOx\* OR Janssen\* OR "JNJ-78436735" OR JNJ78436735\* OR VAC31518\* OR "VAC-31518" OR "Johnson COVID-19" OR "Johnson COVID19" OR Ad26\* OR Ad5\* OR Sputnik\* OR rAd26\* OR rAd5\* OR gamaleya\* OR "Gam-COVID-Vac" OR "recombinant adenovirus type" OR "adenovirus vector" OR "combined vector" OR BBIBP\* OR sinopharm\* OR "vero cell" OR "vero cells" OR covilo OR sinovac\* OR PiCoVax\* OR coronavac\* OR Nuvaxovid\* OR Novavax\* OR "NVX-CoV2373" OR "SARS-CoV-2 rS" OR "M1-Adjuvant" OR "nanoparticle vaccine" OR "Bharat biotech" OR BBV152\* OR "BBV 152A" OR "BBV 152B" OR "BBV152C" OR "BBV152D" OR "BBV 152 A" OR "BBV 152 B" OR "BBV152 C" OR "BBV152 D" OR "BBV-152" OR Covaxin\* OR boost\* OR "third dose" OR "third doses" OR "third dosis" OR "three dose" OR "three doses" OR "three dosis" OR "fourth dose" OR "fourth doses" OR "fourth dosis" OR "four dose" OR "four doses" OR "four dosis")

#3 (TI=(kidney\* OR renal\* OR organ\* OR SOT)) OR AB=(kidney\* OR renal\* OR organ\* OR SOT)

#4 (TI=(transplant\* OR graft\*)) OR AB=(transplant\* OR graft\*)

#5 #1 AND #2 AND #3 AND #4

## WHO COVID 19 Global literature on coronavirus disease

(kidney\* OR renal\* OR organ\* OR sot)

AND

(transplant\* OR graft\*)

AND

(vaccin\* OR biontech\* OR pfizer\* OR comirnaty\* OR cominarty\* OR corminaty\* OR bnt162\* OR "BNT 162" OR "bnt 162b2" OR tozinameran\* OR moderna\* OR spikevax\* OR 1273\* OR mrna1273\* OR "TAK-919" OR "CX-024414" OR cx024414\* OR astrazeneca\* OR oxford\* OR vaxzevria\* OR azd1222\* OR covishield\* OR chadox\* OR janssen\* OR "JNJ-78436735" OR jnj78436735\* OR vac31518\* OR "VAC-31518" OR "Johnson COVID-19" OR "Johnson COVID19" OR ad26\* OR ad5\* OR sputnik\* OR rad26\* OR rad5\* OR gamaleya\* OR "Gam-COVID-Vac" OR "recombinant adenovirus type" OR "adenovirus vector" OR "combined vector" OR bbibp\* OR sinopharm\* OR "vero cell" OR "vero cells" OR covilo OR sinovac\* OR picovac\* OR coronavac\* OR nuvaxovid\* OR novavax\* OR "NVX-CoV2373" OR "SARS-CoV-2 rS" OR "M1-Adjuvant" OR "nanoparticle vaccine" OR "Bharat biotech" OR bbv152\* OR "BBV 152A" OR "BBV 152B" OR "BBV152C" OR "BBV152D" OR "BBV 152 A" OR "BBV 152 B" OR "BBV152 C" OR "BBV152 D" OR "BBV-152" OR covaxin\* OR boost\* OR "third dose" OR "third doses" OR "third dosis" OR OR "fourth dose" OR "fourth doses" OR "fourth dosis" OR "four dose" OR "four doses" OR "four dosis")

## Risk of Bias

Our research question comprised 1) the overall outcome for kidney transplant recipients and 2) the comparative effectiveness of COVID-19 vaccines. We therefore used a tool which is currently in its first phase of development by members of the Cochrane Prognosis Methods Group and Cochrane Haematology, the Risk of Bias in Overall Prognosis Studies (ROB-OPS) tool for 1) and the ROBINS-I tool for non-randomized studies of interventions and the ROB-2 tool for 2).

We assessed the risk of bias by study and by outcome. Each domain received an overall rating of either low, moderate or high rating for risk of bias. Based on the domain-rating for each study and outcome, an overall rating for the outcome per study was created as follows:

- Low risk of bias: no domain rated as high or moderate risk of bias per study and outcome
- Moderate risk of bias: at least one rating as moderate risk of bias per study and outcome group.
- High risk of bias: at least one domain rated as high risk of bias per study and outcome.

Details on the RoB-OPS-tool are to be found at: <https://osf.io/dfk2r>. In Supplemental Table1, the signaling questions and domains can be found

Each domain contains one or more signalling questions and rating options to guide to either “yes”, “probably yes”, “probably no”, “no” or “not sufficient information”.

## Supplemental Table S1: Risk of Bias in Overall Prognosis Studies (ROB-OPS) tool, Version 0.1

| Domain          | Signalling question                                        |
|-----------------|------------------------------------------------------------|
| 1. Participants | 1.1 Was the method of participant recruitment appropriate? |
|                 | 1.2 Were all inclusions and exclusions appropriate?        |
| 2. Outcome      | 2.1 Was the outcome of interest defined appropriately?     |

|                        |                                                                                                               |
|------------------------|---------------------------------------------------------------------------------------------------------------|
|                        | 2.2 Was the used outcome measure appropriate?                                                                 |
|                        | 2.3 Was the duration of follow-up appropriate?                                                                |
|                        | 2.4 Was the outcome determined without knowledge of relevant baseline characteristics?                        |
| 3. Analysis            | 3.1 Were outcome data available for all included participants or likely to be unrelated to the outcome value? |
|                        | 3.2 Were missing outcome data handled appropriately?                                                          |
|                        | 3.3 Was the statistical method for estimating the overall prognosis appropriate?                              |
|                        | 3.4 Were complexities in the analysed data handled appropriately?                                             |
| 4. selective reporting | 4.1 Is the reported outcome likely to be unselected?                                                          |

## Changes to the protocol

### Comparisons

We aimed to compare seroconversion in patients receiving mRNA-1273 vs. BNT162b2. We found only two studies reporting on this outcome. We decided not to create descriptive summary of finding- tables due to the large number of endpoints and tables we provide in our review.

### Outcome measures

Due to the very low number of studies reporting on time to infection, we decided that evidence could not reasonably be gathered from the actual information and do not report it in the review. The same applies to the composite endpoint admission to hospital or death and the endpoint death. we decided not to report mild side effects of vaccination as this has already been published several times and we did not see any additional benefit of this endpoint.

We did not predefine our reporting on correlates of protection. We assumed that several studies would report neutralization specific antibodies, but this was not the case. But we did find that studies reported on certain antibody levels associated with protection against infection. This information was extracted for all studies included in our review.

## Supplemental Figure S1: Risk of Bias Assessment

Seroconversion: RoB-OPS

|       |                    | Risk of bias |    |    |    |         |
|-------|--------------------|--------------|----|----|----|---------|
|       |                    | D1           | D2 | D3 | D4 | Overall |
| Study | COVIReD 2021       | -            | X  | X  | +  | X       |
|       | Massa 2021         | +            | +  | +  | +  | +       |
|       | Benotmane 2021     | -            | +  | +  | +  | -       |
|       | Noble 2021         | -            | -  | +  | +  | -       |
|       | Roch 2022          | -            | +  | +  | +  | -       |
|       | DiaVacc 2021       | +            | +  | +  | +  | +       |
|       | Kantauskaite 2022  | +            | +  | +  | +  | +       |
|       | Schrezenmeier 2022 | -            | +  | +  | +  | -       |
|       | McEvoy 2022        | -            | +  | +  | +  | -       |
|       | Abravanel 2022     | -            | +  | +  | +  | -       |
|       | Tauzin 2022        | -            | +  | X  | +  | X       |
|       | COVAC-Tx 2022      | +            | +  | X  | +  | X       |
|       | Benning 2022       | +            | +  | +  | +  | +       |
|       | Bruminhent 2022    | +            | +  | +  | +  | +       |
|       | Caglioti 2022      | +            | +  | +  | +  | +       |
|       | Cassaniti 2022     | -            | +  | +  | +  | -       |
|       | Schimpf 2022       | -            | +  | +  | ?  | -       |
|       | Midtvedt 2022      | -            | +  | +  | +  | -       |
|       | Mitchell 2022      | -            | -  | +  | ?  | -       |
|       | Grupper 2022       | -            | X  | +  | +  | X       |
|       | Yahav 2022         | +            | +  | +  | +  | +       |

D1: Participants  
 D2: Outcomes  
 D3: Analysis  
 D4: Selective Reporting

Judgement  
 X High  
 - Moderate  
 + Low  
 ? No information

#### Seroconversion: ROBINS-I

|                    |  | Risk of bias domains                                                                |                                                                                     |                                                                                     |                                                                                     |                                                                                     |                                                                                     |                                                                                     |                                                                                     |
|--------------------|--|-------------------------------------------------------------------------------------|-------------------------------------------------------------------------------------|-------------------------------------------------------------------------------------|-------------------------------------------------------------------------------------|-------------------------------------------------------------------------------------|-------------------------------------------------------------------------------------|-------------------------------------------------------------------------------------|-------------------------------------------------------------------------------------|
|                    |  | D1                                                                                  | D2                                                                                  | D3                                                                                  | D4                                                                                  | D5                                                                                  | D6                                                                                  | D7                                                                                  | Overall                                                                             |
| Caillard 2022      |  |  |  |  |  |  |  |  |  |
| Schrezenmeier 2021 |  |  |  |  |  |  |  |  |  |
| COVINEPH 2021      |  |  |  |  |  |  |  |  |  |

Seroconversion: ROB2

|       |              | Risk of bias domains                                                                                                                                                                                                                                                                   |    |    |    |    |                                                    |
|-------|--------------|----------------------------------------------------------------------------------------------------------------------------------------------------------------------------------------------------------------------------------------------------------------------------------------|----|----|----|----|----------------------------------------------------|
| Study | BOOST-TX2021 | D1                                                                                                                                                                                                                                                                                     | D2 | D3 | D4 | D5 | Overall                                            |
|       |              |                                                                                                                                                                                                                                                                                        |    |    |    |    |                                                    |
|       |              | <p>Domains:</p> <p>D1: Bias arising from the randomization process.</p> <p>D2: Bias due to deviations from intended intervention.</p> <p>D3: Bias due to missing outcome data.</p> <p>D4: Bias in measurement of the outcome.</p> <p>D5: Bias in selection of the reported result.</p> |    |    |    |    | <p>Judgement</p> <p> Some concerns</p> <p> Low</p> |



# Neutralization against Delta or Omicron VOC: RoB-OPS

|       |                   | Risk of bias |    |    |    |         |
|-------|-------------------|--------------|----|----|----|---------|
|       |                   | D1           | D2 | D3 | D4 | Overall |
| Study | Al Jurdi 2022     | -            | +  | +  | +  | -       |
|       | Massa 2021        | +            | +  | +  | +  | +       |
|       | Roch 2022         | -            | +  | +  | +  | -       |
|       | Kantauskaite 2022 | +            | +  | +  | +  | +       |
|       | Benotmane 2022    | -            | +  | +  | +  | -       |
|       | McEvoy 2022       | -            | +  | +  | +  | -       |
|       | Tauzin 2022       | -            | +  | X  | +  | X       |
|       | Benning 2022      | +            | +  | +  | +  | +       |
|       | Kumar 2022        | +            | +  | +  | +  | +       |

# T-cell response: RoB-OPS

|       |                 | Risk of bias |    |    |    |         |
|-------|-----------------|--------------|----|----|----|---------|
|       |                 | D1           | D2 | D3 | D4 | Overall |
| Study | DiaVacc 2021    | +            | +  | X  | X  | X       |
|       | Bruminhent 2022 | +            | +  | +  | +  | +       |
|       | Cassaniti 2022  | -            | +  | +  | +  | -       |
|       | Yahav 2022      | +            | +  | +  | +  | +       |

# T-cell response: ROBINS-I

|       |              | Risk of bias |              |              |              |              |              |              |              |
|-------|--------------|--------------|--------------|--------------|--------------|--------------|--------------|--------------|--------------|
|       |              | D1           | D2           | D3           | D4           | D5           | D6           | D7           | Overall      |
| Study | Thomson 2022 | <div>-</div> | <div>+</div> | <div>+</div> | <div>+</div> | <div>+</div> | <div>+</div> | <div>-</div> | <div>-</div> |

# T-cell response: ROB2

|       |              | Risk of bias domains |    |    |    |    |         |
|-------|--------------|----------------------|----|----|----|----|---------|
|       |              | D1                   | D2 | D3 | D4 | D5 | Overall |
| Study | BOOST-TX2021 | +                    | -  | +  | +  | +  | -       |

T-cell response: ROB2

Efficacy (Any infection): RoB-OPS

Efficacy (Any infection): RoB-OPS

|       |                   | Risk of bias |    |    |    |         |
|-------|-------------------|--------------|----|----|----|---------|
|       |                   | D1           | D2 | D3 | D4 | Overall |
| Study | Al Jurdi 2022     | -            | X  | +  | ?  | X       |
|       | Kantauskaite 2022 | +            | X  | X  | ?  | X       |
|       | Benotmane 2022    | -            | -  | X  | ?  | X       |
|       | Caillard 2022     | +            | X  | +  | ?  | X       |
|       | Alejo 2022        | +            | +  | +  | ?  | -       |
|       | Benning 2022      | +            | +  | +  | X  | -       |
|       | Caglioti 2022     | +            | X  | +  | ?  | X       |
|       | Cassaniti 2022    | -            | +  | +  | X  | -       |
|       | Grupper 2022      | -            | +  | +  | X  | -       |

Efficacy (Any infection): ROBINS-I

|       |             | Risk of bias domains |    |    |    |    |    |    |         |
|-------|-------------|----------------------|----|----|----|----|----|----|---------|
|       |             | D1                   | D2 | D3 | D4 | D5 | D6 | D7 | Overall |
| Study | Seija 2022  | -                    | +  | +  | +  | X  | -  | -  | X       |
|       | Abedon 2022 | -                    | +  | +  | +  | +  | -  | X  | X       |

Efficacy (Any infection): ROB2

|       |              | Risk of bias domains |    |    |    |    |         |
|-------|--------------|----------------------|----|----|----|----|---------|
|       |              | D1                   | D2 | D3 | D4 | D5 | Overall |
| Study | BOOST-TX2022 | +                    | +  | +  | +  | -  | -       |

Efficacy (Hospitalization and Death): ROB-OPS

|       |                   | Risk of bias |    |    |    |         |
|-------|-------------------|--------------|----|----|----|---------|
|       |                   | D1           | D2 | D3 | D4 | Overall |
| Study | Al Jurdi 2022     | -            | X  | +  | +  | X       |
|       | Kantauskaite 2022 | +            | X  | X  | ?  | X       |

# Efficacy (Hospitalization and Death): ROBINS-I

|       |            | Risk of bias domains                                                              |                                                                                   |                                                                                   |                                                                                   |                                                                                   |                                                                                   |                                                                                   |                                                                                   |
|-------|------------|-----------------------------------------------------------------------------------|-----------------------------------------------------------------------------------|-----------------------------------------------------------------------------------|-----------------------------------------------------------------------------------|-----------------------------------------------------------------------------------|-----------------------------------------------------------------------------------|-----------------------------------------------------------------------------------|-----------------------------------------------------------------------------------|
|       |            | D1                                                                                | D2                                                                                | D3                                                                                | D4                                                                                | D5                                                                                | D6                                                                                | D7                                                                                | Overall                                                                           |
| Study | Seija 2022 |  |  |  |  |  |  |  |  |

# Efficacy (Hospitalization and Death): ROB2

|       |              | Risk of bias domains                                                              |                                                                                   |                                                                                   |                                                                                   |                                                                                   |                                                                                    |
|-------|--------------|-----------------------------------------------------------------------------------|-----------------------------------------------------------------------------------|-----------------------------------------------------------------------------------|-----------------------------------------------------------------------------------|-----------------------------------------------------------------------------------|------------------------------------------------------------------------------------|
|       |              | D1                                                                                | D2                                                                                | D3                                                                                | D4                                                                                | D5                                                                                | Overall                                                                            |
| Study | BOOST-TX2022 |  |  |  |  |  |  |

# Safety (De-novo DSA): RoB-OPS

|       |                    | Risk of bias |              |              |              |              |
|-------|--------------------|--------------|--------------|--------------|--------------|--------------|
|       |                    | D1           | D2           | D3           | D4           | Overall      |
| Study | Al Jurdi 2022      | <div>-</div> | <div>+</div> | <div>+</div> | <div>+</div> | <div>-</div> |
|       | Massa 2021         | <div>+</div> | <div>+</div> | <div>+</div> | <div>+</div> | <div>+</div> |
|       | Kantauskaite 2022  | <div>+</div> | <div>+</div> | <div>+</div> | <div>+</div> | <div>+</div> |
|       | Schrezenmeier 2022 | <div>-</div> | <div>+</div> | <div>+</div> | <div>+</div> | <div>-</div> |
|       | Cassaniti 2022     | <div>-</div> | <div>+</div> | <div>+</div> | <div>+</div> | <div>-</div> |

# Safety (De-novo DSA): ROBINS-I

|       |             | Risk of bias domains                                                                |                                                                                     |                                                                                     |                                                                                     |                                                                                     |                                                                                     |                                                                                     |                                                                                     |
|-------|-------------|-------------------------------------------------------------------------------------|-------------------------------------------------------------------------------------|-------------------------------------------------------------------------------------|-------------------------------------------------------------------------------------|-------------------------------------------------------------------------------------|-------------------------------------------------------------------------------------|-------------------------------------------------------------------------------------|-------------------------------------------------------------------------------------|
|       |             | D1                                                                                  | D2                                                                                  | D3                                                                                  | D4                                                                                  | D5                                                                                  | D6                                                                                  | D7                                                                                  | Overall                                                                             |
| Study | Regele 2022 |  |  |  |  |  |  |  |  |

Safety (Acute graft rejection): RoB-OPS

|       |                    | Risk of bias |    |    |    |         |
|-------|--------------------|--------------|----|----|----|---------|
|       |                    | D1           | D2 | D3 | D4 | Overall |
| Study | Al Jurdi 2022      | -            | +  | +  | +  | -       |
|       | Massa 2021         | +            | +  | +  | +  | +       |
|       | Benotmane 2022     | -            | -  | +  | +  | -       |
|       | Schrezenmeier 2022 | -            | +  | +  | +  | -       |
|       | Bruminhent 2022    | +            | X  | +  | +  | X       |
|       | Cassaniti 2022     | -            | X  | +  | +  | X       |
|       | Grupper 2022       | -            | +  | +  | +  | -       |
|       | Yahav 2022         | +            | +  | +  | +  | +       |
|       | Midtvedt 2022      | -            | X  | +  | +  | X       |

Safety (Acute graft rejection): ROBINS-I

|       |             | Risk of bias domains                                                                |                                                                                     |                                                                                     |                                                                                     |                                                                                     |                                                                                     |                                                                                     |                                                                                       |
|-------|-------------|-------------------------------------------------------------------------------------|-------------------------------------------------------------------------------------|-------------------------------------------------------------------------------------|-------------------------------------------------------------------------------------|-------------------------------------------------------------------------------------|-------------------------------------------------------------------------------------|-------------------------------------------------------------------------------------|---------------------------------------------------------------------------------------|
|       |             | D1                                                                                  | D2                                                                                  | D3                                                                                  | D4                                                                                  | D5                                                                                  | D6                                                                                  | D7                                                                                  | Overall                                                                               |
| Study | Regele 2022 |  |  |  |  |  |  |  |  |
|       | Seija 2022  |  |  |  |  |  |  |  |  |

Safety (Serious adverse events): RoB-OPS

|       |                 | Risk of bias |    |    |    |         |
|-------|-----------------|--------------|----|----|----|---------|
|       |                 | D1           | D2 | D3 | D4 | Overall |
| Study | Al Jurdi 2022   | ⊖            | ⊖  | ⊕  | ⊕  | ⊖       |
|       | Benotmane 2021  | ⊖            | ⊗  | ⊕  | ⊕  | ⊗       |
|       | Benotmane 2022  | ⊖            | ⊗  | ⊕  | ?  | ⊗       |
|       | Bruminhent 2022 | ⊕            | ⊕  | ⊕  | ⊕  | ⊕       |
|       | Midtvedt 2022   | ⊖            | ⊗  | ⊕  | ⊕  | ⊗       |
|       | Grupper 2022    | ⊖            | ⊗  | ⊕  | ⊕  | ⊗       |

Safety (Serious adverse events): ROBINS-I

|       |               | Risk of bias domains                                                              |                                                                                   |                                                                                   |                                                                                   |                                                                                   |                                                                                   |                                                                                   |                                                                                   |
|-------|---------------|-----------------------------------------------------------------------------------|-----------------------------------------------------------------------------------|-----------------------------------------------------------------------------------|-----------------------------------------------------------------------------------|-----------------------------------------------------------------------------------|-----------------------------------------------------------------------------------|-----------------------------------------------------------------------------------|-----------------------------------------------------------------------------------|
|       |               | D1                                                                                | D2                                                                                | D3                                                                                | D4                                                                                | D5                                                                                | D6                                                                                | D7                                                                                | Overall                                                                           |
| Study | COVINEPH 2021 |  |  |  |  |  |  |  |  |

Safety (Serious adverse events): ROB2

|       |              | Risk of bias domains                                                                |                                                                                     |                                                                                     |                                                                                     |                                                                                     |                                                                                      |
|-------|--------------|-------------------------------------------------------------------------------------|-------------------------------------------------------------------------------------|-------------------------------------------------------------------------------------|-------------------------------------------------------------------------------------|-------------------------------------------------------------------------------------|--------------------------------------------------------------------------------------|
|       |              | D1                                                                                  | D2                                                                                  | D3                                                                                  | D4                                                                                  | D5                                                                                  | Overall                                                                              |
| Study | BOOST-TX2021 |  |  |  |  |  |  |

Supplemental Figure S2 Sensitivity analysis: Exclusion of all studies with high risk of bias.

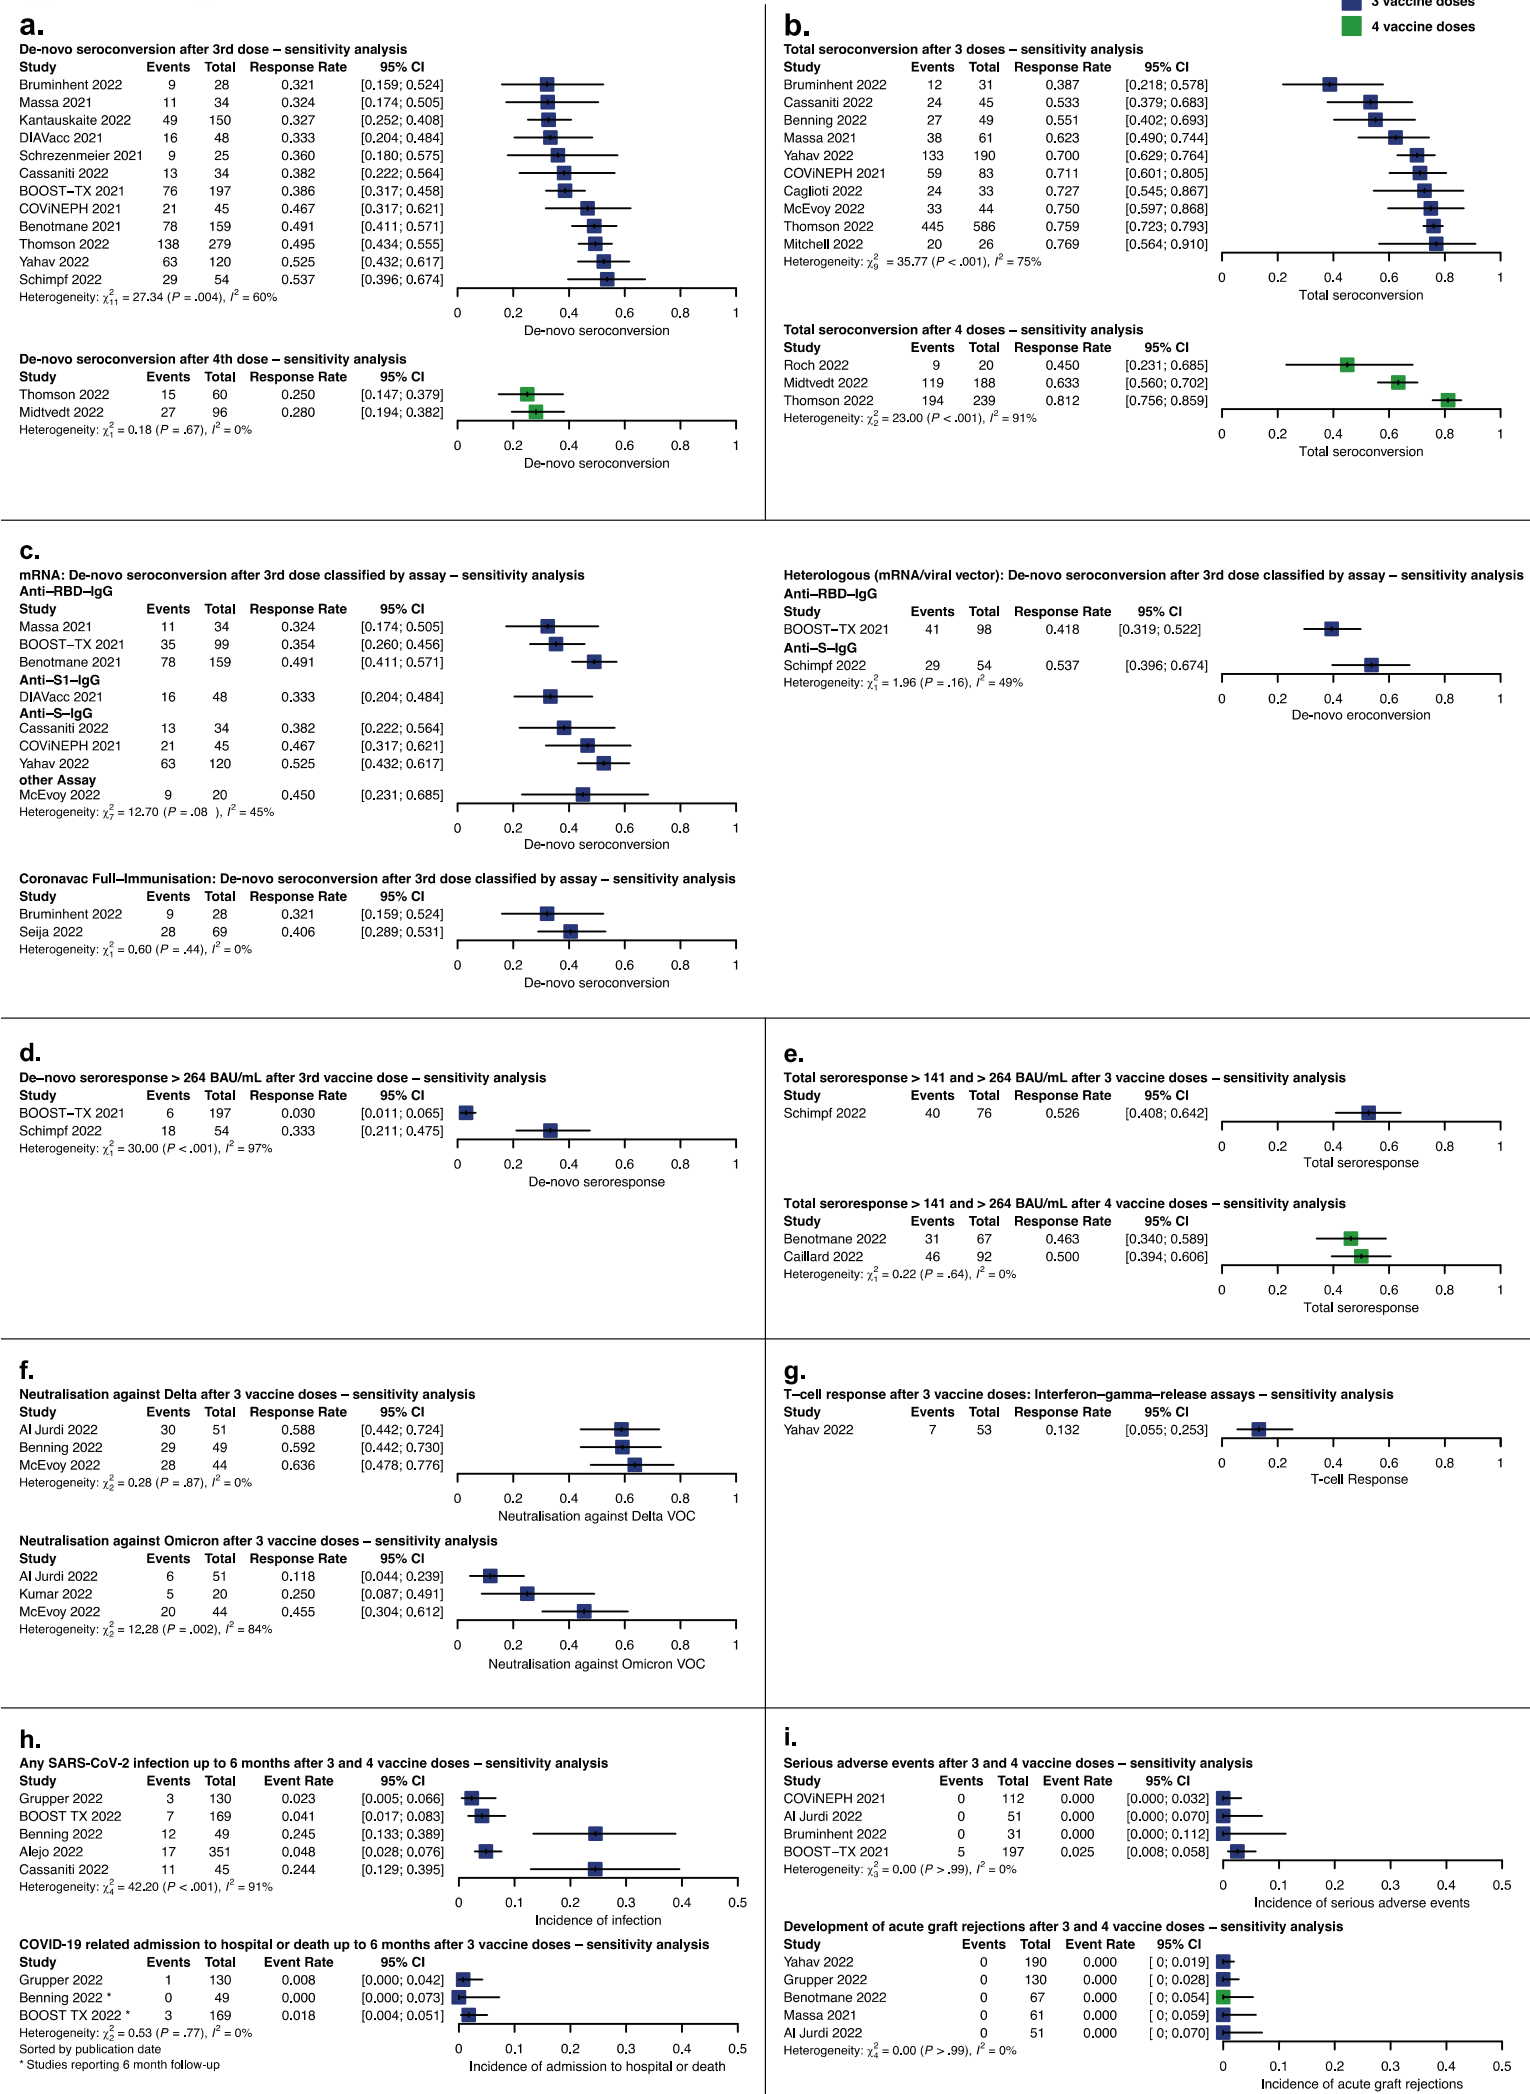

Supplemental Figure S3 Subgroup analysis: Immunosuppressive therapy.

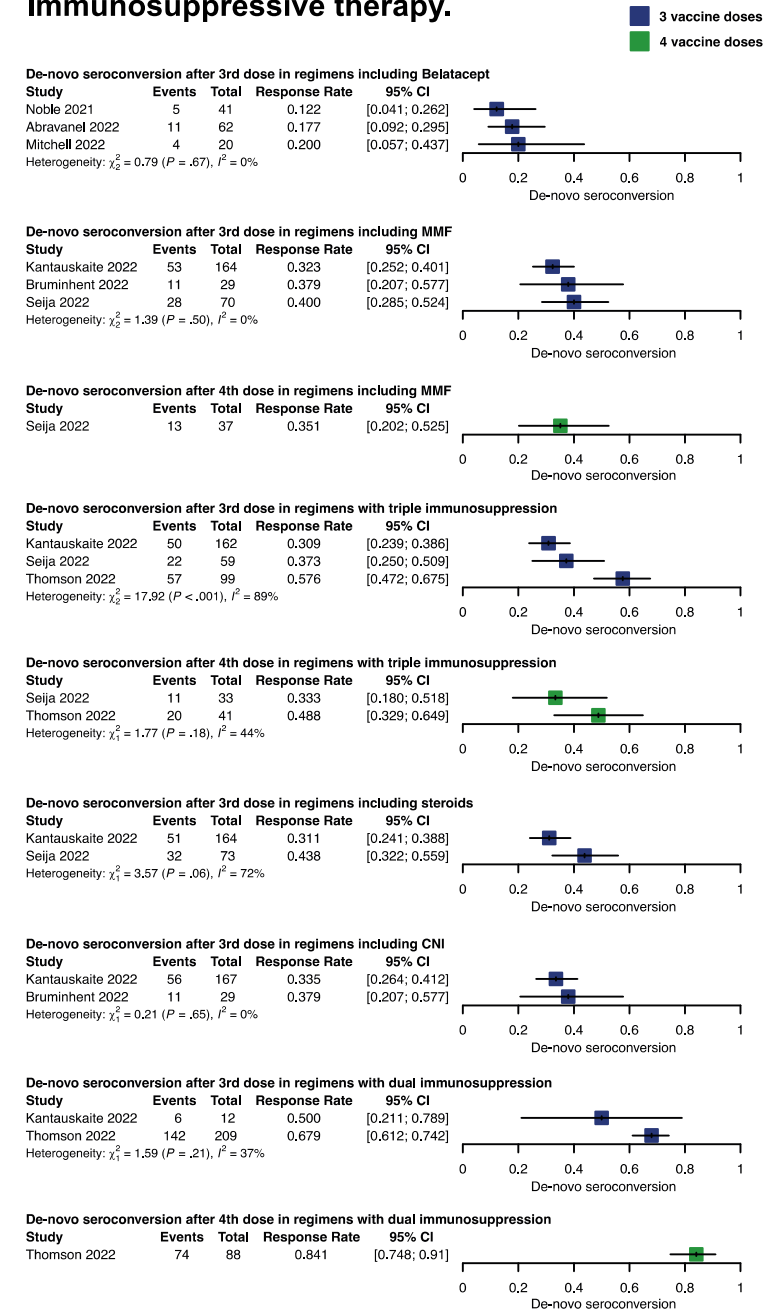

## Supplemental Table S2: Main Study Characteristics

| Study           | Study information |                          |                                 |                             | Population Characteristics                                  |                                                                     |                  |              |                              |                                       |                                            | Information on Vaccination           |                                        |             |                     |                                   |           |                             |
|-----------------|-------------------|--------------------------|---------------------------------|-----------------------------|-------------------------------------------------------------|---------------------------------------------------------------------|------------------|--------------|------------------------------|---------------------------------------|--------------------------------------------|--------------------------------------|----------------------------------------|-------------|---------------------|-----------------------------------|-----------|-----------------------------|
|                 | Country           | Study design             | Participants                    | Special Population          | Intervention                                                | Study population                                                    | Age              | N female (%) | Transplant vintage (months)* | Triple immuno-suppressive therapy (%) | N with Previous SARS-CoV-2 Infection n (%) | Primary vaccination series           | Third dose                             | Fourth dose | Total vaccine doses | Last vaccination interval (days)* | Follow up | N receiving additional dose |
| Abedon 2022     | USA               | case series              | KTRs + 4 KPTRs+1KLT Rs          | no                          | BNT126b2, mRNA-1273, Ad26.COV2.S <b>separately reported</b> | including seropositive patients                                     | 54 (45-71)       | 22 (69)      | 91.2 (43.2-156)              | NR                                    | 0                                          | mRNA                                 | Ad26.CO V2.S or BNT162b 2 or mRNA-1273 | none        | 3                   | NR                                | 6 months  | 32                          |
| Abravanel 2022  | France            | prospective cohort study | SOTRs (68 in total, 62 KTRs)    | Belatacept treated patients | BNT162b2                                                    | including seropositive patients                                     | NR               | NR           | NR                           | NR                                    | 0                                          | BNT162b2                             | BNT162b 2                              | none        | 3                   | 56 (11)                           | 1 month   | 62                          |
| Al Jurdi 2022   | USA               | prospective cohort study | KTRs                            | no                          | BNT162b2, mRNA-1273                                         | including seropositive patients                                     | 63 (54-69)       | 23 (43)      | 43 (4-443)                   | NR                                    | 4 (8)                                      | mRNA                                 | mRNA                                   | none        | 3                   | 187 (181-193)                     | 1 month   | 51                          |
| Alejo 2022      | USA               | prospective cohort study | SOTRs (660 in total, 351 KTRs)  | no                          | BNT162b2, mRNA-1273, AD.26.COV2.S                           | including seropositive patients                                     | NR               | NR           | NR                           | NR                                    | 0                                          | Ad26.COV2.S or BNT162b2 or mRNA-1273 | Ad26.CO V2.S or BNT162b 2 or mRNA-1273 | none        | ≥3                  | NR                                | 3 months  | 351                         |
| Benning 2022    | Germany           | prospective cohort study | KTRs                            | no                          | mRNA                                                        | including seropositive patients                                     | 55 (46-65)       | 20 (41)      | 97.2 (28.8-163.2)            | >80%                                  | 0                                          | mRNA or ChAdOx1                      | mRNA                                   | none        | 3                   | 138 (117-162)                     | 3 weeks   | 49                          |
| Benotmane 2021  | France            | prospective cohort study | KTRs                            | no                          | mRNA-1273                                                   | including only patients without seroconversion after primary series | 57.6 (49.6-66.1) | 61 (38.4)    | 63.6 (22.8-133.12)           | 50 %                                  | 0                                          | mRNA-1273                            | mRNA-1273                              | none        | 3                   | 51 (48-59)                        | 1 month   | 159                         |
| Benotmane 2022  | France            | prospective cohort study | KTRs                            | no                          | mRNA-1273                                                   | including seropositive patients                                     | 56.6 (47-64.4)   | 26 (39)      | 73.2 (26.4-136.8)            | >75%                                  | 0                                          | mRNA-1273                            | mRNA-1273                              | mRNA-1273   | 4                   | 68 (63-82)                        | 1 month   | 67                          |
| BOOST-TX 2021   | Austria           | RCT                      | KTRs                            | no                          | BNT162b2, mRNA-1273, Ad26.COV2.S <b>separately reported</b> | including only patients without seroconversion after primary series | 61.2 (12.4)      | 82 (42)      | 56.16                        | 90 %                                  | 0                                          | mRNA                                 | Ad26.CO V2.S or mRNA                   | none        | 3                   | 78 (56-87)                        | 1 month   | 197                         |
| Bruminhent 2022 | Thailand          | prospective cohort study | KTRs, 28 PD, and 31 HD patients | no                          | ChAdOx1-S                                                   | including seropositive patients                                     | 51 (42-54)       | 13 (42)      | NR                           | NR                                    | 0                                          | Coronavac                            | ChAdOx1-S                              | none        | 3                   | 30-60                             | 4-6 weeks | 31                          |
| Caglioti 2022   | Italy             | prospective cohort study | KTRs                            | no                          | BNT162b2                                                    | including seropositive patients                                     | 55.4 (12.8)      | 14 (42)      | NR                           | 61 %                                  | NR                                         | BNT162b2                             | BNT162b 2                              | none        | 3                   | 180                               | 3 weeks   | 33                          |



| Study             | Study information |                          |                        |                                            |                                                                                             | Population Characteristics                                                 |                   |              |                                                               |                                       | Information on Vaccination                 |                            |                                     |             |                     |                                   |            |                             |
|-------------------|-------------------|--------------------------|------------------------|--------------------------------------------|---------------------------------------------------------------------------------------------|----------------------------------------------------------------------------|-------------------|--------------|---------------------------------------------------------------|---------------------------------------|--------------------------------------------|----------------------------|-------------------------------------|-------------|---------------------|-----------------------------------|------------|-----------------------------|
|                   | Country           | Study design             | Participants           | Special Population                         | Intervention                                                                                | Study population                                                           | Age               | N female (%) | Transplant vintage (months)*                                  | Triple immuno-suppressive therapy (%) | N with Previous SARS-CoV-2 Infection n (%) | Primary vaccination series | Third dose                          | Fourth dose | Total vaccine doses | Last vaccination interval (days)* | Follow up  | N receiving additional dose |
| Caillard 2022     | France            | case series              | KTRs                   | no                                         | BNT162b2, mRNA-1273, <b>separately reported</b>                                             | including only patients with low or no seroconversion after primary series | 55.9 (47.1-64.2)  | 28 (30.4)    | 66 (27.6-136.8)                                               | 70 %                                  | NR                                         | mRNA                       | mRNA                                | mRNA        | 4                   | 68 (61-74.7)                      | 1 month    | 92                          |
| Cassaniti 2022    | Italy             | prospective cohort study | KTRs                   | no                                         | BNT162b2                                                                                    | including seropositive patients                                            | 52.6 (47.2-60)    | 22 (48.9)    | 51 (26-78.5)                                                  | 64 %                                  | 0                                          | BNT162b2                   | BNT162b2                            | none        | 3                   | 180                               | 3 weeks    | 45                          |
| COVAC-Tx 2022     | Denmark           | prospective cohort study | SOTRs (281 KTRs)       | no                                         | BNT162b2                                                                                    | including seropositive patients                                            | NR                | NR           | NR                                                            | NR                                    | n.a.                                       | BNT162b2                   | BNT162b2                            | none        | 3                   | NR                                | 5-6 weeks  | 240                         |
| COViNEPH 2021     | Poland            | prospective cohort study | KTRs                   | no                                         | BNT162b2, mRNA-1273, <b>separately reported</b>                                             | including seropositive patients                                            | 55 (42-63)        | 29 (34.94)   | 96 (42-180)                                                   | 70 %                                  | 0                                          | mRNA                       | mRNA                                | none        | 3                   | 90                                | 2-3 weeks  | 112                         |
| COVIRed 2021      | Israel            | prospective cohort study | KTRs                   | no                                         | BNT162b2                                                                                    | including seropositive patients                                            | NR                | NR           | NR                                                            | NR                                    | 0                                          | BNT162b2                   | BNT162b2                            | none        | 3                   | NR                                | 8-117 days | 118                         |
| de Boer 2022      | The Netherlands   | RCT                      | KTRs                   | elderly KTRs recently receiving transplant | mRNA vaccine + co-intervention: MPA reduction vs. MPA free triple immunosuppressive regimen | including seropositive patients                                            | 72(4)             | 12 (38)      | 7 (5-11.24) or 8.5 (4.5-10.5)                                 | 100 %                                 | 0                                          | mRNA                       | mRNA                                | none        | 3                   | 202 (184-215)                     | 2 months   | 22                          |
| DIAVacc 2021      | Germany           | prospective cohort study | KTRs                   | no                                         | BNT162b2                                                                                    | including seropositive patients                                            | 57 (14.4)         | 18(37)       | 90±72                                                         | <50%                                  | 0                                          | BNT162b2                   | BNT162b2                            | none        | 3                   | 68± 1                             | 1 month    | 48                          |
| Grupper 2022      | Israel            | prospective cohort study | KTRs, 4 LKTRs, 8 PKTRs | no                                         | BNT162b2                                                                                    | including seropositive patients                                            | 58 (12.8)         | 29 (60.4)    | 66±88.1                                                       | 77.60 %                               | 0                                          | BNT162b2                   | BNT162b2                            | none        | 3                   | 150                               | 3 weeks    | 130                         |
| Kantauskaite 2022 | Germany           | prospective cohort study | KTRs                   | no                                         | BNT162b2, ChadOx1, Ad26.COV2.S <b>not reported separately</b>                               | including only patients without seroconversion after primary series        | 59.4              | 60 (34.5)    | 46 (22-111) for seronegative vs. 92 (56-152) for seropositive | 88 %                                  | 0                                          | mRNA                       | Ad26.CO V2.S or ChadOx1 or BNT162b2 | none        | 3                   | 76±25                             | 3 weeks    | 174                         |
| Kumar 2022        | Canada            | prospective cohort study | SOTRs, KTRs            | no                                         | mRNA-1273                                                                                   | including seropositive patients                                            | NR                | NR           | NR                                                            | NR                                    | 0                                          | mRNA-1273                  | mRNA-1273                           | none        | 3                   | 90                                | 1 month    | 20                          |
| Malahe 2022       | The Netherlands   | prospective cohort study | SOTRs, KTRs            | no                                         | mRNA                                                                                        | including seropositive patients                                            | 54 (range: 34-84) | 19 (44)      | 56% >5 years, 7% < 1y, 12% 1-5y, 24% >5y                      | <50%                                  | NR                                         | mRNA                       | mRNA                                | none        | 3                   | NR                                | 2 months   | 38                          |
| Massa 2021        | France            | prospective cohort study | KTRs                   | no                                         | BNT162b2                                                                                    | including seropositive patients                                            | 58.0 (47.1-66)    | 17 (27.9)    | 54 (21.6-135.6)                                               | 60-70%                                | 0                                          | BNT162b2                   | BNT162b2                            | none        | 3                   | 28                                | 1 month    | 61                          |

| Study              | Study information |                                |              |                             |                                                                                                                   | Population Characteristics                                                 |                  |              |                                                                            |                                       | Information on Vaccination                 |                            |                      |              |                     |                                      |           |                             |
|--------------------|-------------------|--------------------------------|--------------|-----------------------------|-------------------------------------------------------------------------------------------------------------------|----------------------------------------------------------------------------|------------------|--------------|----------------------------------------------------------------------------|---------------------------------------|--------------------------------------------|----------------------------|----------------------|--------------|---------------------|--------------------------------------|-----------|-----------------------------|
|                    | Country           | Study design                   | Participants | Special Population          | Intervention                                                                                                      | Study population                                                           | Age              | N female (%) | Transplant vintage (months)*                                               | Triple immuno-suppressive therapy (%) | N with Previous SARS-CoV-2 Infection n (%) | Primary vaccination series | Third dose           | Fourth dose  | Total vaccine doses | Last vaccination interval (days)*    | Follow up | N receiving additional dose |
| McEvoy 2022        | Canada            | prospective cohort study       | K1Rs         | no                          | BNT162b2, mRNA-1273 <b>separately reported</b>                                                                    | including seropositive patients                                            | 55-5 (45.8-63)   | 9 (20.5)     | 43.1 (7-142)                                                               | 70.50 %                               | 2 (4.5)                                    | mRNA                       | mRNA                 | none         | 3                   | 152 (127.3-185.7)                    | 1 month   | 44                          |
| Midtvedt 2022      | Norway            | prospective cohort study       | KTRs         | no                          | mRNA-1273                                                                                                         | including only patients with low or no seroconversion after primary series | 60 (12)          | 79 (42)      | 99.6±84                                                                    | 86 %                                  | 0                                          | mRNA                       | mRNA                 | mRNA         | 4                   | 126 (67.9-128.1)                     | 1 month   | 188                         |
| Mitchell 2022      | USA               | prospective cohort study       | KTRs         | Belatacept treated patients | mRNA or Ad26.COv2.S <b>not reported separately</b>                                                                | including seropositive patients                                            | 61.9 (52.4-68.6) | 17 (68)      | 40.8 (25.2-105.6)                                                          | NR                                    | 0                                          | mRNA                       | Ad26.CO V2.S or mRNA | none         | 3                   | NR                                   | 2-4 weeks | 26                          |
| Noble 2021         | France            | prospective cohort study       | KTRs         | Belatacept treated patients | BNT126b2, mRNA-1273                                                                                               | including seropositive patients                                            | 62 (13)          | 18 (31.5)    | 122 (81) for Belatacept group vs. 174 (346) months in the tacrolimus group | NR                                    | NR                                         | mRNA                       | mRNA                 | none         | 3                   | NR                                   | 1 month   | 57                          |
| Regele 2022        | Austria           | controlled clinical trail (CT) | KTRs         | no                          | BNT162b2 + co- <u>intervention</u> : MPA hold vs. standard triple                                                 | including only patients without seroconversion after primary series        | 63.97 (9.16)     | 15 (38)      | 47 (32.5-90.5)                                                             | 100 %                                 | 0                                          | mRNA or viral vector       | mRNA or viral vector | BNT162b 2    | 4                   | 136 (127-141)                        | 1 month   | 39                          |
| Roch 2022          | Germany           | prospective cohort study       | KTRs         | no                          | Ad26.COv2.S                                                                                                       | including only patients with low or no seroconversion after primary series | 64.6 (10.33)     | 7 (35)       | NR                                                                         | 75 %                                  | NR                                         | BNT162b2                   | BNT162b 2            | Ad26.CO V2.S | 4                   | >28 days later, not closer specified | 1 month   | 20                          |
| Schimpf 2022       | Austria           | prospective cohort study       | KTRs         | no                          | Ad26.COv2.S                                                                                                       | including seropositive patients                                            | 60.6 (no SD)     | 30 (40)      | 109 months                                                                 | NR                                    | NR                                         | mRNA                       | Ad26.CO V2.S         | none         | 3                   | 109 (range 109.0-145.0)              | 6 weeks   | 76                          |
| Schrezenmeier 2021 | Germany           | prospective cohort study       | KTRs         | no                          | BNT162b2, ChAdOx1 <b>separately reported</b>                                                                      | including only patients without seroconversion after primary series        | 59.7 (13.8)      | 11 (44)      | 124.8±104.28                                                               | 80 %                                  | 0                                          | mRNA                       | BNT162b 2 or ChAdOx1 | none         | 3                   | 127 ± 1                              | 2-4 weeks | 25                          |
| Schrezenmeier 2022 | Germany           | prospective cohort study       | KTRs         | no                          | mRNA, ChAdOx1 + co- <u>intervention</u> : Reduction of MPA homologous and heterologous <b>separately reported</b> | including only patients without seroconversion after primary series        | 59.8 (14.8)      | 12 (41.4)    | 118.8± 70.8                                                                | 80 %                                  | 0                                          | mRNA                       | mRNA                 | BNT162b 2    | 4                   | 59.1 ±12.6                           | 1 month   | 29                          |
| Seija 2022         | Uruguay           | prospective cohort study       | KTRs         | no                          | BNT162b2 on BNT162b2 primay series or on                                                                          | including seropositive patients                                            | 58 (45-72)       | 41 (37.6)    | 68 (32-146)                                                                | 76 %                                  | 0                                          | Coronavac 2x               | BNT162b 2            | BNT162b 2    | 3 and 4             | 30                                   | 1 month   | 109                         |

| Study        | Study information |                          |                              |                    |                                                                                         | Population Characteristics      |                                                               |              |                              |                                       |                                            | Information on Vaccination |                      |             |                     |                                   |           |                             |
|--------------|-------------------|--------------------------|------------------------------|--------------------|-----------------------------------------------------------------------------------------|---------------------------------|---------------------------------------------------------------|--------------|------------------------------|---------------------------------------|--------------------------------------------|----------------------------|----------------------|-------------|---------------------|-----------------------------------|-----------|-----------------------------|
|              | Country           | Study design             | Participants                 | Special Population | Intervention                                                                            | Study population                | Age                                                           | N female (%) | Transplant vintage (months)* | Triple immuno-suppressive therapy (%) | N with Previous SARS-CoV-2 Infection n (%) | Primary vaccination series | Third dose           | Fourth dose | Total vaccine doses | Last vaccination interval (days)* | Follow up | N receiving additional dose |
|              |                   |                          |                              |                    | Coronavac primary series, <b>separately reported</b>                                    |                                 |                                                               |              |                              |                                       |                                            |                            |                      |             |                     |                                   |           |                             |
| Tauzin 2022  | Canada            | prospective cohort study | SOTRs,KTRs                   | no                 | mRNA                                                                                    | including seropositive patients | 46 (range: 23-73)                                             | 12 (39)      | 24.48 (-4.8-275.16)          | >80%                                  | n.a.                                       | mRNA                       | mRNA                 | none        | 3                   | 111 (range 34 - 153)              | 1 month   | 27                          |
| Thomson 2022 | UK                | prospective cohort study | KTRs                         | no                 | BNT162b2 on BNT162b2 primary series or BNT162b2 on ChadOx1-S <b>separately reported</b> | including seropositive patients | 61 (51-68) for seronegative, 60 (49-67) for seropositive KTRs | 202 (35)     | NR                           | 17 %                                  | 0                                          | ChadOx1-S or BNT162b2      | mRNA                 | None/mRNA   | 3 and 4             | 167 (145-189), 174 (156-189)      | 1 month   | 586                         |
| Werbel 2021  | USA               | case series              | SOTRs (30 in total, 23 KTRs) | no                 | BNT162b2, mRNA-1273, Ad26.COV2.S <b>separately reported</b>                             | including seropositive patients | whole study group: (57, 44 to 62)                             | 12 (52)      | 87.7± 72.3                   | 83 %                                  | 0                                          | mRNA                       | Ad26.CO V2.S or mRNA | none        | 3                   | 76.2±16.3                         | 2-3 weeks | 23                          |
| Wong 2022    | Australia         | prospective cohort study | KTRs + KPTRs                 | no                 | BNT162b2                                                                                | including seropositive patients | NR                                                            | NR           | NR                           | >85%                                  | 0                                          | ChadOx1-S or BNT162b2      | BNT162b2             | none        | 3                   | 98                                | 1 month   | 23                          |
| Yahav 2022   | Israel            | prospective cohort study | KTRs,                        | no                 | BNT162b2                                                                                | including seropositive patients | 59.3 (12.4)                                                   | 61 (32.1)    | 89.76±95.76                  | 85 %                                  | NR                                         | BNT162b2                   | BNT162b2             | none        | 3                   | 163.38±18.4                       | 1 month   | 190                         |

## Supplemental Table S3: Antibody Titers

| Study          | Information on Vaccination |            |                                           |                     |                                   | Population Characteristics                                                 |                    |            |                              |                                   |           | Serologic Assessment        |                                                                                     |                                                            |                                |                                          |              |                     |                                           |              |        |
|----------------|----------------------------|------------|-------------------------------------------|---------------------|-----------------------------------|----------------------------------------------------------------------------|--------------------|------------|------------------------------|-----------------------------------|-----------|-----------------------------|-------------------------------------------------------------------------------------|------------------------------------------------------------|--------------------------------|------------------------------------------|--------------|---------------------|-------------------------------------------|--------------|--------|
|                | Primary vaccination series | Third dose | Fourth dose                               | Total vaccine doses | Last vaccination interval (days)* | Study population                                                           | Age                | N female   | Transplant vintage (months)* | Triple immuno-suppressive therapy | Follow-up | Definition of sero-response | Assay                                                                               | De-novo response after additional dose?                    | N with additional vaccine dose | AB Titers after additional dose (median) | IQR          | N with primary dose | AB Titers before additional dose (median) | IQR          | Units  |
| Benning 2022   | mRNA or ChAdOx1            | mRNA       | none                                      | 3                   | 138 (117-162)                     | including seropositive patients                                            | 55 (46-65)         | 20 (41)    | 97.2 (28.8-163.2)            | >80%                              | 3 weeks   | Anti-RBD-IgG                | bead-based multiplex assay Luminex platform (LabScreen Covid Plus, One Lambda Inc.) | including titers under seropositivity threshold            | 49                             | 12322                                    | 0-21413      | NR                  | NR                                        | NR           | MFI    |
| Benotmane 2021 | mRNA-1273                  | mRNA-1273  | none                                      | 3                   | 51 (48-59)                        | including only patients without seroconversion after primary series        | 57.6 (49.6 - 66.1) | 61 (38.4)  | 63.6 (22.8-133.12)           | 50 %                              | 1 month   | Anti-RBD-IgG                | ARCHITEC T IgG II Quant test (Abbott)                                               | de-novo seroresponse                                       | 78                             | 586                                      | 197.2-1920.1 | NR                  | NR                                        | NR           | AU/mL  |
| Benotmane 2022 | mRNA-1273                  | mRNA-1273  | mRNA-1273                                 | 4                   | 68 (63-82)                        | including seropositive patients                                            | 56.6 (47-64.4)     | 26 (39)    | 73.2 (26.4-136.8)            | >75%                              | 1 month   | Anti-RBD-IgG                | ARCHITEC T IgG II Quant test (Abbott, Abbott Park, IL, USA)                         | including titers under seropositivity threshold            | 60                             | 112.5                                    | 13.5-260     | 67                  | 13.0                                      | 2.6-66.3     | BAU/mL |
| Caillard 2022  | mRNA                       | mRNA       | BNT162b2 or mRNA-1273 separately reported | 4                   | 68 (61-74.7)                      | including only patients with low or no seroconversion after primary series | 55.9 (47.1 - 64.2) | 28 (30.4)  | 66 (27.6-136.8)              | 70 %                              | 1 month   | Anti-S-IgG                  | NR                                                                                  | including titers under seropositivity threshold            | 92                             | 145                                      | 27.6-243     | 92                  | 16.4                                      | 5.9-62.3     | BAU/mL |
| Cassaniti 2022 | BNT162b2                   | BNT162b2   | none                                      | 3                   | 180                               | including seropositive patients                                            | 52.6 (47.2 -60)    | 22 (48.9)  | 51 (26-78.5)                 | 64 %                              | 3 weeks   | Anti-S-IgG                  | Liaison SARS-CoV-2 trimeric, Diasorin                                               | including titers under seropositivity threshold            | 24                             | 52.5                                     | 4.8-1178     | 20                  | 4.8                                       | 4.8-85.3     | BAU/mL |
| COViNEPH 2021  | BNT162b2                   | BNT162b2   | none                                      | 3                   | 90                                | including seropositive patients                                            | 54.5 (44.5 -63)    | 36 (32.14) | 96 (42-180)                  | 70 %                              | 2-3 weeks | Anti-S-IgG                  | LIAISON SARS-CoV2-trimeric IgG                                                      | Total response including only patients with seroconversion | 60                             | 384.5                                    | 144-837      | 60                  | 213.2                                     | 81.2 - 548.6 | BAU/mL |

| Study             | Information on Vaccination |                                                                   |                                                   |                     |                                      | Population Characteristics                                                 |              |           |                                                               |                                   | Serologic Assessment |                             |                                                                                                                           |                                                            |                                |                                          |                |                     |                                           |            |        |
|-------------------|----------------------------|-------------------------------------------------------------------|---------------------------------------------------|---------------------|--------------------------------------|----------------------------------------------------------------------------|--------------|-----------|---------------------------------------------------------------|-----------------------------------|----------------------|-----------------------------|---------------------------------------------------------------------------------------------------------------------------|------------------------------------------------------------|--------------------------------|------------------------------------------|----------------|---------------------|-------------------------------------------|------------|--------|
|                   | Primary vaccination series | Third dose                                                        | Fourth dose                                       | Total vaccine doses | Last vaccination interval (days)*    | Study population                                                           | Age          | N female  | Transplant vintage (months)*                                  | Triple immuno-suppressive therapy | Follow-up            | Definition of sero-response | Assay                                                                                                                     | De-novo response after additional dose?                    | N with additional vaccine dose | AB Titers after additional dose (median) | IQR            | N with primary dose | AB Titers before additional dose (median) | IQR        | Units  |
| Kantauskaitė 2022 | mRNA                       | Ad26.COV2.S or ChadOx1 or BNT162b2 <b>not reported separately</b> | none                                              | 3                   | 76 (25)                              | including only patients without seroconversion after primary series        | 59.4         | 60 (34.5) | 46 (22-111) for seronegative vs. 92 (56-152) for seropositive | 88 %                              | 3 weeks              | Anti-S1-IgG                 | Anti- spike-S1- IgG Anti-SARS-CoV-2- QuantiVac-ELISA (EUROIMMUN)                                                          | Total response including only patients with seroconversion | 56                             | 119                                      | 76-353         | NR                  | NR                                        |            | BAU/mL |
| Roch 2022         | BNT162b2                   | BNT162b2                                                          | Ad26.COV2.S                                       | 4                   | >28 days later, not closer specified | including only patients with low or no seroconversion after primary series | 64.6 (10.33) | 7 (35)    | NR                                                            | 75 %                              | 1 month              | Anti-S-IgG                  | Elecsys Anti-SARS-CoV-2 S (Roche Diagnostics)                                                                             | Total response including only patients with seroconversion | 8                              | 50                                       | 11.3-342.9     | 8                   | 3.7                                       | 0.6-35.9   | U/mL   |
| Seija 2022        | BNT162b2                   | BNT162b2                                                          | none                                              | 3                   | 30                                   | including seropositive patients                                            | 58 (45-72)   | 41 (37.6) | 68 (32-146)                                                   | 76 %                              | 1 month              | Anti-RBD-IgG                | COVID-19 IgG QUANT ELISA Kit (developed by Universidad de la Republica, Institut Pasteur de Montevideo and ATGen Company) | de-novo seroresponse                                       | 6                              | 37                                       | 18-188         | NR                  | NR                                        |            | BAU/mL |
| Thomson 2022      | ChadOx1-S or BNT162b2      | mRNA                                                              | none                                              | 3                   | NR                                   | including seropositive patients                                            | NR           | 202 (34)  | NR                                                            | 17 %                              | 1 month              | Anti-S-IgG                  | Abbott Architect SARS-CoV-2 IgG Quant II CMIA                                                                             | including titers under seropositivity threshold            | 586                            | 295                                      | 9.1-1611       | 586                 | 9.2                                       | 7.1-173    | BAU/mL |
| Thomson 2022      | ChadOx1-S or BNT162b2      | mRNA                                                              | BNT162b2 or mRNA-1273, <b>separately reported</b> | 4                   | NR                                   | including seropositive patients                                            | NR           | 202 (34)  | NR                                                            | 17 %                              | 1 month              | Anti-S-IgG                  | Abbott Architect SARS-CoV-2 IgG Quant II CMIA                                                                             | including titers under seropositivity threshold            | 239                            | 437                                      | 25-2211        | NR                  | NR                                        |            | BAU/mL |
| Yahav 2022        | BNT162b2                   | BNT162b2                                                          | none                                              | 3                   | 163.38 (18.4)                        | including seropositive patients                                            | 59.3 (12.4)  | 61 (32.1) | 89.76 ± 95.76                                                 | 85 %                              | 1 month              | Anti-S-IgG                  | SARS-CoV-2 IgG II Quant (Abbott)                                                                                          | including titers under seropositivity threshold            | 190                            | 514.35                                   | 19.35 - 5474.4 | 190                 | 13.8                                      | 2.6-111.55 | AU/mL  |

\* usually reported as mean±SD or median (Q1-Q3). If reported as median (range), this was specified.

## Supplemental Table S4: Neutralizing antibodies against Delta

| Study             | Country | Information on Vaccination |                                                                    |             |                     |                                      | Population Characteristics                                                 |                   |              |                                                               |                                      |                                   | Serologic Assessment |                                             |                     |                                         |                     |              |
|-------------------|---------|----------------------------|--------------------------------------------------------------------|-------------|---------------------|--------------------------------------|----------------------------------------------------------------------------|-------------------|--------------|---------------------------------------------------------------|--------------------------------------|-----------------------------------|----------------------|---------------------------------------------|---------------------|-----------------------------------------|---------------------|--------------|
|                   |         | Primary vaccination series | Third dose                                                         | Fourth dose | Total vaccine doses | Last vaccination interval (days) *   | Study population                                                           | Age               | N female (%) | Transplant vintage (months) *                                 | Patients receiving additional dose N | Triple immuno-suppressive therapy | Follow-up            | Definition of serologic response            | Assay               | De-novo response after additional dose? | Patients analyzed N | Response (%) |
| Al Jurdi 2022     | USA     | mRNA                       | mRNA                                                               | none        | 3                   | 187 (181-193)                        | including seropositive patients                                            | 63 (54-69)        | 23 (43)      | 43 (4-443)                                                    | 51                                   | NR                                | 1 month              | Surrogate virus neutralization test (SVNT)  | GenScript cPass kit | total response                          | 51                  | 59           |
| Benning 2022      | Germany | mRNA or ChAdOx2            | mRNA                                                               | none        | 3                   | 138 (117-162)                        | including seropositive patients                                            | 55 (46-65)        | 20 (41)      | 97.2 (28.8-163.2)                                             | 49                                   | >80%                              | 3 weeks              | Plaque reduction neutralization test (PRNT) | in-house brew       | total response                          | 49                  | 59           |
| Benotmane 2022    | France  | mRNA-1273                  | mRNA-1273                                                          | mRNA-1273   | 4                   | 68 (63-82)                           | including seropositive patients                                            | 56.6 (47-64.4)    | 26 (39)      | 73.2 (26.4-136.8)                                             | 67                                   | >75%                              | 1 month              | Pseudotype assay                            | in-house brew       | total response                          | 67                  | 58           |
| Kantauskaite 2022 | Germany | mRNA                       | Ad26.COV2.S or ChadOx1 or BNT162b2, <b>not reported separately</b> | none        | 3                   | 76 (25)                              | including only patients without seroconversion after primary series        | 59.4              | 60 (34.5)    | 46 (22-111) for seronegative vs. 92 (56-152) for seropositive | 174                                  | 88 %                              | 3 weeks              | Plaque reduction neutralization test (PRNT) | in-house brew       | de novo response                        | 56                  | 36           |
| McEvoy 2022       | Canada  | mRNA                       | mRNA                                                               | none        | 3                   | 152 (127.3-185.7)                    | including seropositive patients                                            | 55.5 (45.8-63)    | 9 (20.5)     | 43.1 (7-142)                                                  | 44                                   | 70.50 %                           | 1 month              | Pseudotype assay                            | in-house brew       | total response                          | 44                  | 64           |
| Roch 2022         | Germany | BNT162b2                   | BNT162b2                                                           | Ad26.COV2.S | 4                   | >28 days later, not closer specified | including only patients with low or no seroconversion after primary series | 64.6 (10.33)      | 7 (35)       | NR                                                            | 20                                   | 75 %                              | 1 month              | Pseudotype assay                            | in-house brew       | total response in all seropositive KTRs | 9                   | 44           |
| Tauzin 2022       | Canada  | mRNA                       | mRNA                                                               | none        | 3                   | 111 (range 34 - 153)                 | including seropositive patients                                            | 46 (range: 23-73) | 12 (39)      | 24.48 (-4,8-275,16)                                           | 27                                   | >80%                              | 1 month              | Pseudotype assay                            | in-house brew       | total response                          | 27                  | 52           |

\* usually reported as mean±SD or median (Q1-Q3). If reported as median (range), this was specified.

Supplemental Table S5: Neutralizing antibodies against Omicron

| Study             | Country | Information on Vaccination |                                                                        |             |                     |                                    | Population Characteristics                                          |                  |           |                                                               |                                    |                                  | Serologic Assessment |                                             |                     |                                         |    | Patients analyzed<br>N | Response (%) |
|-------------------|---------|----------------------------|------------------------------------------------------------------------|-------------|---------------------|------------------------------------|---------------------------------------------------------------------|------------------|-----------|---------------------------------------------------------------|------------------------------------|----------------------------------|----------------------|---------------------------------------------|---------------------|-----------------------------------------|----|------------------------|--------------|
|                   |         | Primary vaccination series | Third dose                                                             | Fourth dose | Total vaccine doses | Last vaccination interval (days) * | Study population                                                    | Age (Yrs)        | N female  | Transplant vintage (months) *                                 | Patients receiving additional dose | Triple immunosuppressive therapy | Follow-up            | Definition of serologic response            | Assay               | De-novo response after additional dose? |    |                        |              |
| Al Jurdi 2022     | USA     | mRNA                       | mRNA                                                                   | none        | 3                   | 187 (181-193)                      | including seropositive patients                                     | 63 (54-69)       | 23 (43)   | 43 (4-443)                                                    | 51                                 | NR                               | 1 month              | Surrogate virus neutralization test (SVNT)  | GenScript cPass kit | total response                          | 51 | 12                     |              |
|                   |         |                            |                                                                        |             |                     |                                    |                                                                     |                  |           |                                                               |                                    |                                  |                      |                                             |                     | de novo response                        | 51 | 12                     |              |
| Benning 2022      | Germany | mRNA or ChAdOx1            | mRNA                                                                   | none        | 3                   | 138 (117-162)                      | including seropositive patients                                     | 55 (46-65)       | 20 (41)   | 97.2 (28.8-163.2)                                             | 49                                 | >80%                             | 3 weeks              | Plaque reduction neutralization test (PRNT) | in-house brew       | total response in all seropositive KTRs | 35 | 43                     |              |
| Kantauskaite 2022 | Germany | mRNA                       | Ad26.COV2.S or ChAdOx1 or BNT162b2,)<br><b>not reported separately</b> | none        | 3                   | 76± 25                             | including only patients without seroconversion after primary series | 59.4             | 60 (34.5) | 46 (22-111) for seronegative vs. 92 (56-152) for seropositive | 174                                | 88 %                             | 3 weeks              | Plaque reduction neutralization test (PRNT) | in-house brew       | de novo response                        | 56 | 5                      |              |
| Kumar 2022        | Canada  | mRNA-1273                  | mRNA-1273                                                              | none        | 3                   | 90                                 | including seropositive patients                                     | NR               | NR        | NR                                                            | 20                                 | NR                               | 1 month              | Pseudotype assay                            | in-house brew       | total response                          | 20 | 25                     |              |
| McEvoy 2022       | Canada  | mRNA                       | mRNA                                                                   | none        | 3                   | 152 (127.3-185.7)                  | including seropositive patients                                     | 55.5 (45.8-63)   | 9 (20.5)  | 43.1 (7-142)                                                  | 44                                 | 70.50 %                          | 1 month              | Pseudotype assay                            | in-house brew       | total response                          | 44 | 45                     |              |
| Tauzin 2022       | Canada  | mRNA                       | mRNA                                                                   | none        | 3                   | 111 (range 34 - 153)               | including seropositive patients                                     | 46 (range 23-73) | 12 (39)   | 24.48 (-4.8-275.16)                                           | 27                                 | >80%                             | 1 month              | Pseudotype assay                            | in-house brew       | total response                          | 27 | 70                     |              |

\* usually reported as mean±SD or median (Q1-Q3). If reported as median (range), this was specified.

## Supplemental Table S6: T-cell response



| Study           | Information on Vaccination                             |                                                |             |                     |                                | Population Characteristics                                                 |                                                                               |           |                                           |                             |                                  |                                                                                | Serologic Assessment          |                                                   | Patients analyzed<br>N | Response (%) |
|-----------------|--------------------------------------------------------|------------------------------------------------|-------------|---------------------|--------------------------------|----------------------------------------------------------------------------|-------------------------------------------------------------------------------|-----------|-------------------------------------------|-----------------------------|----------------------------------|--------------------------------------------------------------------------------|-------------------------------|---------------------------------------------------|------------------------|--------------|
|                 | Primary vaccination series                             | Third dose                                     | Fourth dose | Total vaccine doses | Last vaccination interval*     | Study population                                                           | Age                                                                           | N female  | Transplant vintage (months)*              | N receiving additional dose | Triple immunosuppressive therapy | Follow-up                                                                      | Definition of T-cell response | Assay                                             |                        |              |
| BOOST-TX 2021   | mRNA                                                   | mRNA or Ad26.COV2.S <b>separately reported</b> | none        | 3                   | 78 (56-87) days                | including only patients without seroconversion after primary series        | 61.2 (12.4)                                                                   | 82 (42)   | 56.16 (28.92-99)/49.8 (20.4-87.48) months | 197                         | 90 %                             | 29 (28-32) days for the intervention group vs. 30 (28-33) days for the control | Quantiferon/IGRA              | QuantiFERON SARS-CoV-2 assays (Qiagen)            | 197                    | 9            |
| Bruminhent 2022 | Sinovac 2x                                             | ChAdOx1-S                                      | none        | 3                   | 1-2 months                     | including seropositive patients                                            | 51 (42-54)                                                                    | 13 (42)   | NR                                        | 31                          | NR                               | 2 weeks                                                                        | ELISpot/ T-SPOT               | in house brew                                     | 31                     | 58           |
| Cassaniti 2022  | BNT162b2 2x                                            | BNT162b2                                       | none        | 3                   | 180 days                       | including seropositive patients                                            | 52.6 (47.2-60)                                                                | 22 (48.9) | 51 (26-78.5)                              | 45                          | 64 %                             | 21 days                                                                        | ELISpot/ T-SPOT               | in- house brew                                    | 45                     | 76           |
| DIAVacc 2021    | BNT162b2 2x                                            | BNT162b2                                       | none        | 3                   | 68±1 days                      | including seropositive patients                                            | 57 (14.4)                                                                     | 18(37)    | 90±72                                     | 48                          | <50%                             | 4 weeks                                                                        | Quantiferon/IGRA              | Interferon gamma (IFNg) release assay (EUROIMMUN) | 35                     | 26           |
| Roch 2022       | BNT162b2 2x                                            | BNT162b2                                       | Ad26.COV2.S | 4                   | >28 days, not closer specified | including only patients with low or no seroconversion after primary series | 64.6 (10.33) for seronegative and 67.5 (IQR 60.5-70.75) for seropositive KTRs | 7 (35)    | 81 (38.5-140)                             | 20                          | 75 %                             | 35 (IQR 15.25) days                                                            | FACS Analysis: CD4+ T-cells   | in house brew                                     | 20                     | 55           |
|                 |                                                        |                                                |             |                     |                                |                                                                            |                                                                               |           |                                           |                             |                                  |                                                                                | FACS Analysis: CD8+ T-cells   |                                                   |                        | 45           |
| Thomson 2022    | ChadOx1-S 2x or BNT162b2 2x <b>separately reported</b> | BNT162b2                                       | mRNA        | 4                   | 3-4 months                     | including seropositive patients                                            | 58 (50-66) for seronegative and 61 (53-68) for seropositive KTRs              | 90 (37.6) | NR                                        | 138                         | 17 %                             | 38 (27-55) days                                                                | ELISpot/ T-SPOT               | T-SPOT Discovery SARS-CoV-2 (Oxford Immunotec)    | 54                     | 20           |
|                 |                                                        |                                                | none        | 3                   | NR                             |                                                                            | NR                                                                            | 192 (34)  | NR                                        | 561                         | 16%                              | 35 (24-46) days                                                                |                               |                                                   | 30                     | 40           |
| Yahav 2022      | BNT162b2 2x                                            | BNT162b2                                       | none        | 3                   | 163.38±18.4 days               | including seropositive patients                                            | 56.49 (SD 13.49)                                                              | 17 (32.1) | 92.76±99.96                               | 190                         | 85 %                             | 29 days (IQR 20-33)                                                            | Quantiferon/IGRA              | Interferon gamma (IFNg) release assay (EUROIMMUN) | 53                     | 13           |

\* usually reported as mean±SD or median (Q1-Q3). If reported as median (range), this was specified.

## Supplemental Table S7: Co-interventions

| Study              | Study design  | Information on Vaccination                             |                                                                      |             |                     |                                                       |                                                                           |                                   | Population Characteristics                                          |              |                 |                               |                                        | Serologic Assessment |                                         |                                  |                                                                 |                         |                       |
|--------------------|---------------|--------------------------------------------------------|----------------------------------------------------------------------|-------------|---------------------|-------------------------------------------------------|---------------------------------------------------------------------------|-----------------------------------|---------------------------------------------------------------------|--------------|-----------------|-------------------------------|----------------------------------------|----------------------|-----------------------------------------|----------------------------------|-----------------------------------------------------------------|-------------------------|-----------------------|
|                    |               | Primary vaccination series                             | Third dose                                                           | Fourth dose | Total vaccine doses | Intervention                                          | Comparator                                                                | Last vaccination interval (days)* | Study population                                                    | Age          | <i>N</i> female | Transplant vintage (months)*  | Patients with additional dose <i>N</i> | Follow-up            | De-novo response after additional dose? | Definition of serologic response | Assay                                                           | Response Intervention % | Response Comparator % |
| de Boer 2022       | RCT           | mRNA                                                   | mRNA                                                                 | none        | 3                   | mRNA vaccine + Reduction of MPA dose                  | mRNA vaccine + MPA- free triple regime                                    | 202 (184-215)                     | including seropositive patients                                     | 72(4)        | 12 (38)         | 7 (5-11.24) or 8.5 (4.5-10.5) | 22                                     | 2 months             | de-novo response                        | Anti-RBD-IgG                     | SARS-CoV-2 IgG II Quant (Abbott©)                               | 33.3                    | 100.0                 |
| Kantauskaite 2022  | observational | mRNA                                                   | Ad26.COV2.S or ChadOx1 or BNT162b2<br><b>Not reported separately</b> | none        | 3                   | BNT162b2 ChadOx1, Ad26.COV2.S + Reduction of MPA dose | BNT162b2 ChadOx1, Ad26.COV2.S + MPA full dose                             | 76 ±25                            | including only patients without seroconversion after primary series | 63 (10)      | 7 (29)          | 30 (21–68) vs. 29 (15-45)     | 29                                     | 3 weeks              | de-novo response                        | Anti-S1-IgG                      | Anti- spike-S1-IgG Anti-SARS-CoV-2- QuantiVac-ELISA (EUROIMMUN) | 29.2                    | 4.2                   |
| Regele 2022        | NRCT          | mRNA or viral vector<br><b>Not reported separately</b> | mRNA or viral vector<br><b>Not reported separately</b>               | BNT162b2    | 4                   | BNT162b2+ MPA hold                                    | BNT162b2 + MPA full dose                                                  | 136 (127-141)                     | including only patients without seroconversion after primary series | 63.97 (9.16) | 15 (38)         | 47 (32.5-90.5)                | 39                                     | 1 month              | de-novo response                        | Anti-RBD-IgG                     | Elecsys Anti-SARS-CoV-2 enzyme immunoassay (Roche Diagnostics)  | 33.3                    | 31.8                  |
| Schrezenmeier 2022 | observational | mRNA                                                   | mRNA                                                                 | BNT162b2    | 4                   | BNT162b2+ MPA hold                                    | BNT126b2 after heterologous (viral vector or mRNA) vaccination + MPA hold | 59.1±12.6                         | including only patients without seroconversion after primary series | 59.8 (14.8)  | 12 (41.4)       | 118.8 (70.8)                  | 29                                     | 1 month              | de-novo response                        | Anti-S-IgG                       | anti S- IgG (EUROIMMUN)                                         | 71.4                    | 80.0                  |
| Yahav 2022         | observational | BNT162b2                                               | BNT162b2                                                             | none        | 3                   | BNT162b2+ Reduction or hold of MPA dose               | BNT162b2+ MPA full dose                                                   | NR                                | including seropositive patients                                     | NR           | NR              | NR                            | 19                                     | 1 month              | de-novo response                        | Anti-S-IgG                       | SARS-CoV-2 IgG II Quant (Abbott©)                               | 53                      | 53                    |

\* usually reported as mean±SD or median (Q1-Q3). If reported as median (range), this was specified.

Supplemental Table S8: Transplant vintage of patients with and without seroconversion

| Study             | Total vaccine doses | Seropositive KTRS |                     |                          | Seronegative KTRs |                             |                          |
|-------------------|---------------------|-------------------|---------------------|--------------------------|-------------------|-----------------------------|--------------------------|
|                   |                     | Seropositive KTR  | TX Vintage (median) | Transplant vintage (IQR) | Seronegative KTR  | Transplant vintage (median) | Transplant vintage (IQR) |
| Abedon 2022       | 3                   | 20                | 6.45                | 3.275 - 10.275           | 3                 | 4.61                        | 1.5 - 5.55               |
| Kantauskaite 2022 | 3                   | 56                | 7.67                | 4.67 - 12.67             | 118               | 3.83                        | 1.83 - 9.25              |
| Seija 2022        | 4                   | 15                | 5.67                | 2.83 - 12.91             | 26                | 4.10                        | 2.83 - 10.33             |
| Werbel 2021       | 3                   | 6                 | 9.50                | 4.4 - 12.4               | 14                | 4.00                        | 2.25 - 6.75              |

## Checklist of items to include when reporting a systematic review or meta-analysis (PRISMA)

| Section/topic             | # | Checklist item                                                                                                                                                                                                                                                                                              | Reported on page #        |
|---------------------------|---|-------------------------------------------------------------------------------------------------------------------------------------------------------------------------------------------------------------------------------------------------------------------------------------------------------------|---------------------------|
| <b>TITLE</b>              |   |                                                                                                                                                                                                                                                                                                             |                           |
| Title                     | 1 | Identify the report as a systematic review, meta-analysis, or both.                                                                                                                                                                                                                                         | Title page                |
| <b>ABSTRACT</b>           |   |                                                                                                                                                                                                                                                                                                             |                           |
| Structured summary        | 2 | Provide a structured summary including, as applicable: background; objectives; data sources; study eligibility criteria, participants, and interventions; study appraisal and synthesis methods; results; limitations; conclusions and implications of key findings; systematic review registration number. | First page                |
| <b>INTRODUCTION</b>       |   |                                                                                                                                                                                                                                                                                                             |                           |
| Rationale                 | 3 | Describe the rationale for the review in the context of what is already known.                                                                                                                                                                                                                              | Page 4                    |
| Objectives                | 4 | Provide an explicit statement of questions being addressed with reference to participants, interventions, comparisons, outcomes, and study design (PICOS).                                                                                                                                                  | Page 4                    |
| <b>METHODS</b>            |   |                                                                                                                                                                                                                                                                                                             |                           |
| Protocol and registration | 5 | Indicate if a review protocol exists, if and where it can be accessed (e.g., Web address), and, if available, provide registration information including registration number.                                                                                                                               | Page 4                    |
| Eligibility criteria      | 6 | Specify study characteristics (e.g., PICOS, length of follow-up) and report characteristics (e.g., years considered, language, publication status) used as criteria for eligibility, giving rationale.                                                                                                      | Pages 4 to 5              |
| Information sources       | 7 | Describe all information sources (e.g., databases with dates of coverage, contact with study authors to identify additional studies) in the search and date last searched.                                                                                                                                  | Pages 4 to 5 and Appendix |
| Search                    | 8 | Present full electronic search strategy for at least one database, including any limits used, such that it could be repeated.                                                                                                                                                                               | Appendix                  |
| Study selection           | 9 | State the process for selecting studies (i.e., screening, eligibility, included in systematic review, and, if applicable, included in the meta-analysis).                                                                                                                                                   | Figure 1                  |

| Section/topic                      | #  | Checklist item                                                                                                                                                                                                         | Reported on page #            |
|------------------------------------|----|------------------------------------------------------------------------------------------------------------------------------------------------------------------------------------------------------------------------|-------------------------------|
| Data collection process            | 10 | Describe method of data extraction from reports (e.g., piloted forms, independently, in duplicate) and any processes for obtaining and confirming data from investigators.                                             | Pages 4 to 5                  |
| Data items                         | 11 | List and define all variables for which data were sought (e.g., PICOS, funding sources) and any assumptions and simplifications made.                                                                                  | Pages 4 to 5                  |
| Risk of bias in individual studies | 12 | Describe methods used for assessing risk of bias of individual studies (including specification of whether this was done at the study or outcome level), and how this information is to be used in any data synthesis. | Pages 4 to 5                  |
| Summary measures                   | 13 | State the principal summary measures (e.g., risk ratio, difference in means).                                                                                                                                          | Pages 4 to 5                  |
| Synthesis of results               | 14 | Describe the methods of handling data and combining results of studies, if done, including measures of consistency (e.g., $I^2$ ) for each meta-analysis.                                                              | Pages 4 to 5                  |
| Risk of bias across studies        | 15 | Specify any assessment of risk of bias that may affect the cumulative evidence (e.g., publication bias, selective reporting within studies).                                                                           | Page 9                        |
| Additional analyses                | 16 | Describe methods of additional analyses (e.g., sensitivity or subgroup analyses, meta-regression), if done, indicating which were pre-specified.                                                                       | Pages 4 to 5                  |
| <b>RESULTS</b>                     |    |                                                                                                                                                                                                                        |                               |
| Study selection                    | 17 | Give numbers of studies screened, assessed for eligibility, and included in the review, with reasons for exclusions at each stage, ideally with a flow diagram.                                                        | Page 6, Fig.1                 |
| Study characteristics              | 18 | For each study, present characteristics for which data were extracted (e.g., study size, PICOS, follow-up period) and provide the citations.                                                                           | Appendix Table 2              |
| Risk of bias within studies        | 19 | Present data on risk of bias of each study and, if available, any outcome-level assessment (see Item 12).                                                                                                              | Appendix Fig. 1               |
| Results of individual studies      | 20 | For all outcomes considered (benefits or harms), present, for each study: (a) simple summary data for each intervention group and (b) effect estimates and confidence intervals, ideally with a forest plot.           | Pages 6 to 9, Figures 2 and 3 |

| Section/topic               | #  | Checklist item                                                                                                                                                                        | Reported on page #                                    |
|-----------------------------|----|---------------------------------------------------------------------------------------------------------------------------------------------------------------------------------------|-------------------------------------------------------|
| Synthesis of results        | 21 | Present results of each meta-analysis done, including confidence intervals and measures of consistency.                                                                               | n.a.                                                  |
| Risk of bias across studies | 22 | Present results of any assessment of risk of bias across studies (see Item 15).                                                                                                       | n.a.                                                  |
| Additional analysis         | 23 | Give results of additional analyses, if done (e.g., sensitivity or subgroup analyses, meta-regression) (see Item 16).                                                                 | Pages 8 to 9, Appendix tables 7, 8, Appendix figure 3 |
| DISCUSSION                  |    |                                                                                                                                                                                       |                                                       |
| Summary of evidence         | 24 | Summarize the main findings including the strength of evidence for each main outcome; consider their relevance to key groups (e.g., health care providers, users, and policy makers). | Page 10                                               |
| Limitations                 | 25 | Discuss limitations at study and outcome level (e.g., risk of bias), and at review level (e.g., incomplete retrieval of identified research, reporting bias).                         | Page 10                                               |
| Conclusions                 | 26 | Provide a general interpretation of the results in the context of other evidence, and implications for future research.                                                               | Page 11                                               |
| FUNDING                     |    |                                                                                                                                                                                       |                                                       |
| Funding                     | 27 | Describe sources of funding for the systematic review and other support (e.g., supply of data); role of funders for the systematic review.                                            | Page 6                                                |
